# Supplementary material for: Exploring wintertime regional haze in northeast China: role of coal and biomass burning
Source: Copernicus journal article supplement (doi:10.5194/acp-20-5355-2020), 2020-05-07
Supplement: Supplementary file 1 [file acp-20-5355-2020-supplement.pdf]

Supplement of Atmos. Chem. Phys., 20, 5355–5372, 2020  
<https://doi.org/10.5194/acp-20-5355-2020-supplement>  
© Author(s) 2020. This work is distributed under  
the Creative Commons Attribution 4.0 License.

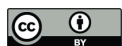

*Supplement of*

## **Exploring wintertime regional haze in northeast China: role of coal and biomass burning**

**Jian Zhang et al.**

*Correspondence to:* Weijun Li (liweijun@zju.edu.cn)

The copyright of individual parts of the supplement might differ from the CC BY 4.0 License.

## 1. ECD vs. ESD

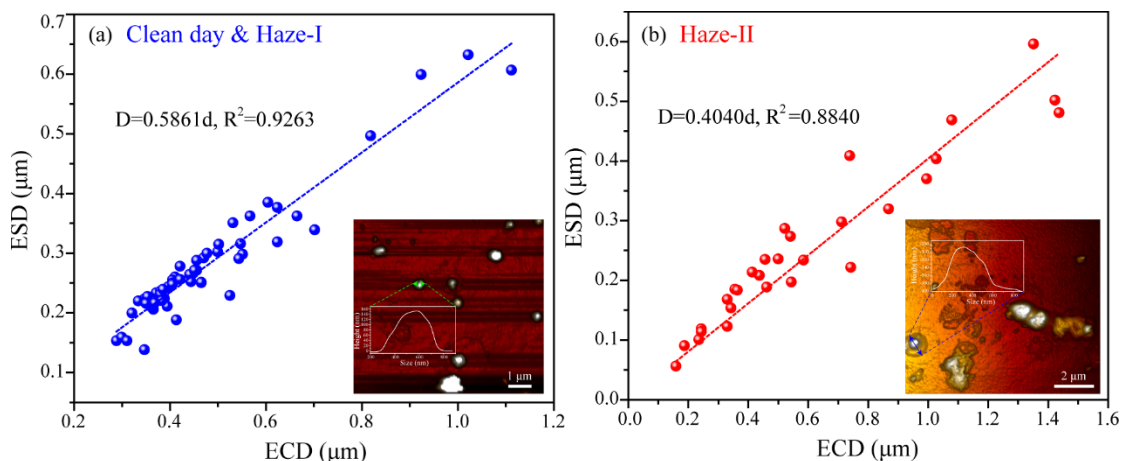

**Figure S1.** Linear correlations between equivalent circle diameter (ECD,  $d$ ) and equivalent sphere diameter (ESD,  $D$ ) and atomic force microscopy (AFM) images of individual particles during the clean day and Haze-I (a) and Haze-II (b).

## 2. Concentrations of $\text{PM}_{2.5}$ and its chemical compositions

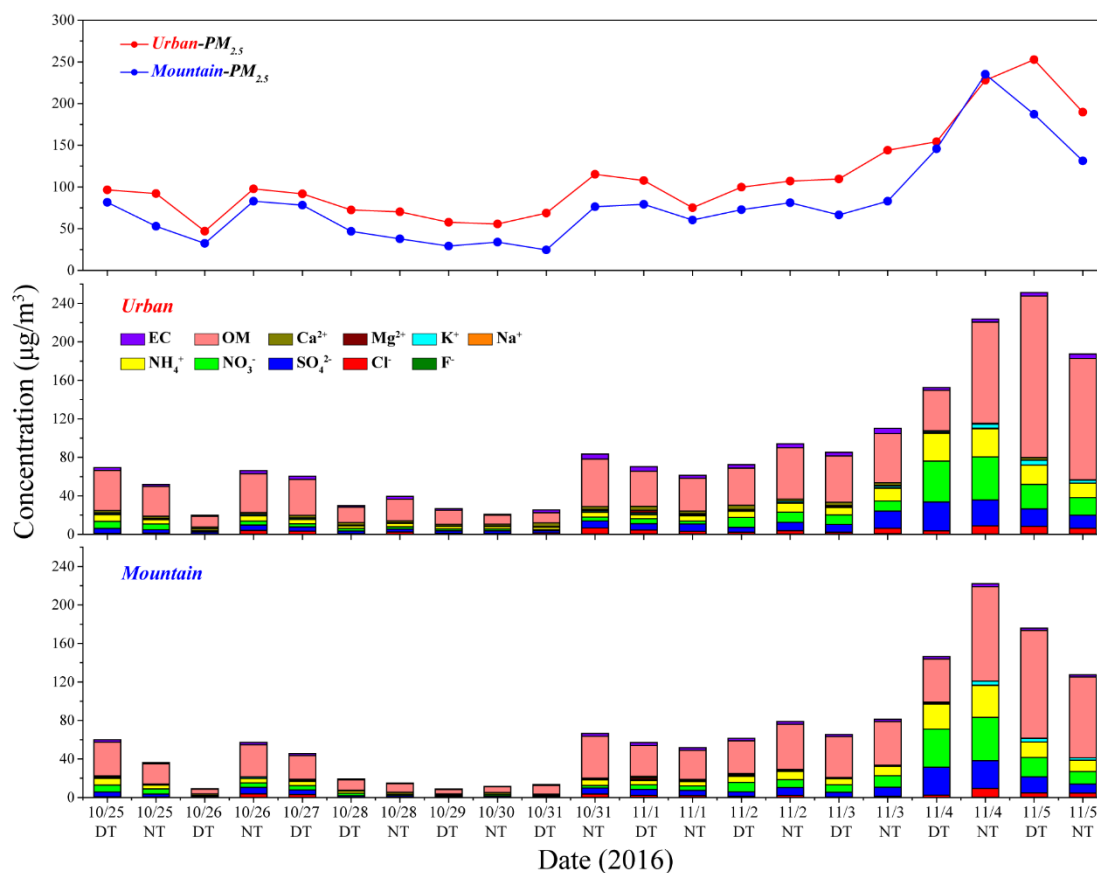

**Figure S2.** Time series of mass concentrations of  $\text{PM}_{2.5}$  and its chemical compositions at the urban

and mountain sites during the sampling period.

### 3. Air quality map in Northeast China

Figure S3 shows three typical air quality maps of Northeast China on 31 October, 3 November, and 4 November, suggesting that a regional haze pollution occurred in Northeast China during 31 October-5 November.

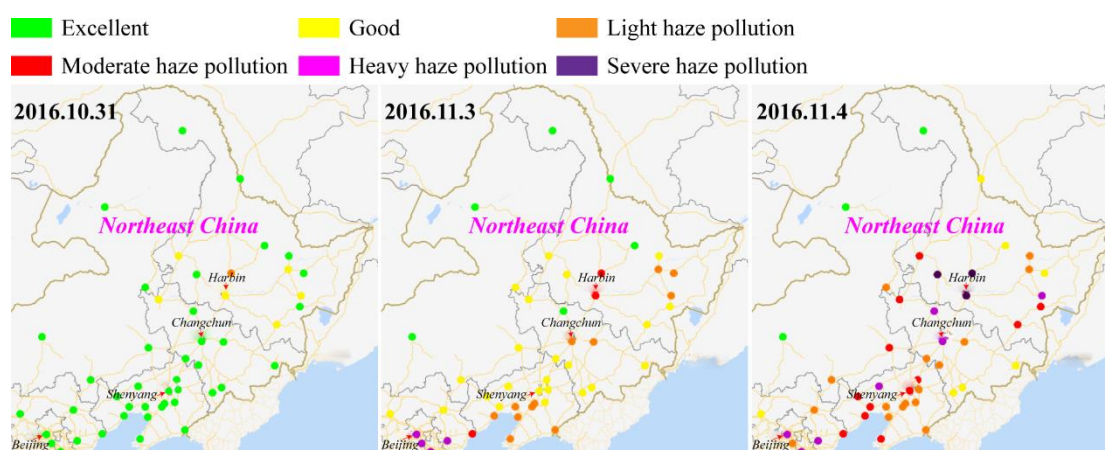

**Figure S3.** Daily air quality in many cities in Northeast China on 31 October, 3 November, and 4 November 2016 during the sampling period. The data are derived from China's Air Quality Online Monitoring and Analysis Platform (<https://www.aqistudy.cn/>), while the maps are from © Baidu and © OpenStreetMap contributors 2019 distributed under a Creative Commons BY-SA License (<https://www.openstreetmap.org/>).

### 4. Meteorological fields

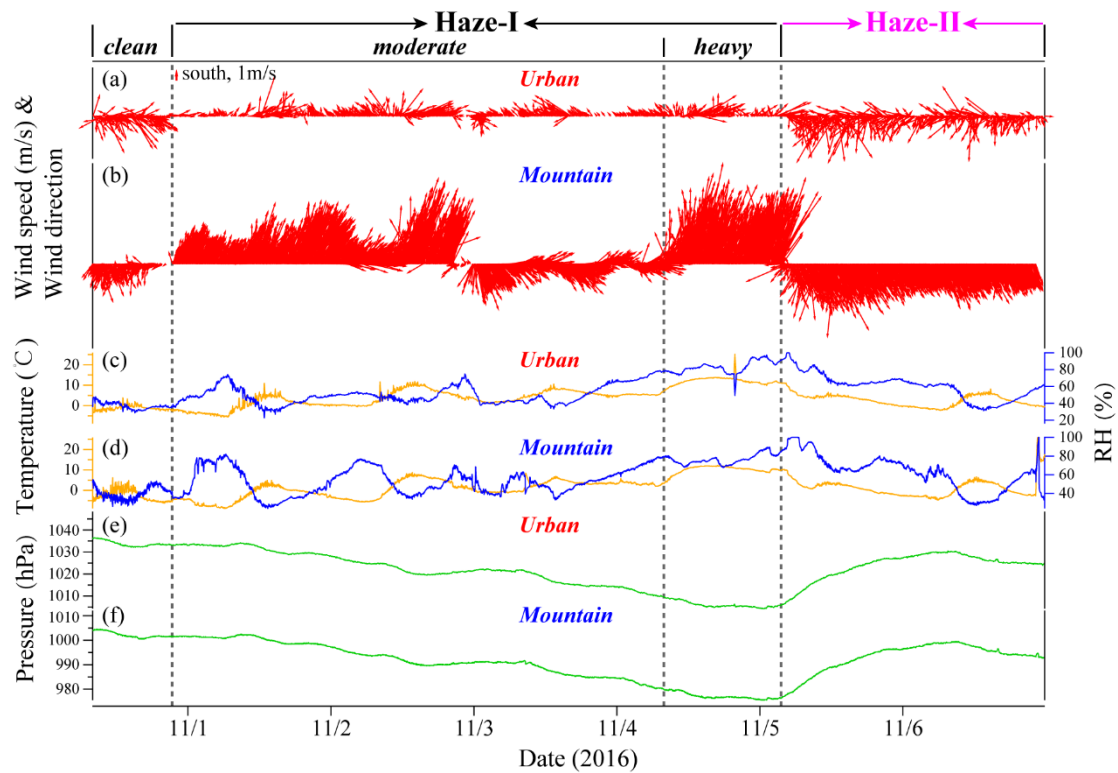

**Figure S4.** Time series of meteorological parameters at the urban and mountain sites from 31 October to 6 November 2016: **(a-b)** wind speed and wind direction; **(c-d)** temperature and relative humidity (RH); **(e-f)** pressure.

## 5. Air mass backward trajectories and CWT plots of PM<sub>2.5</sub>

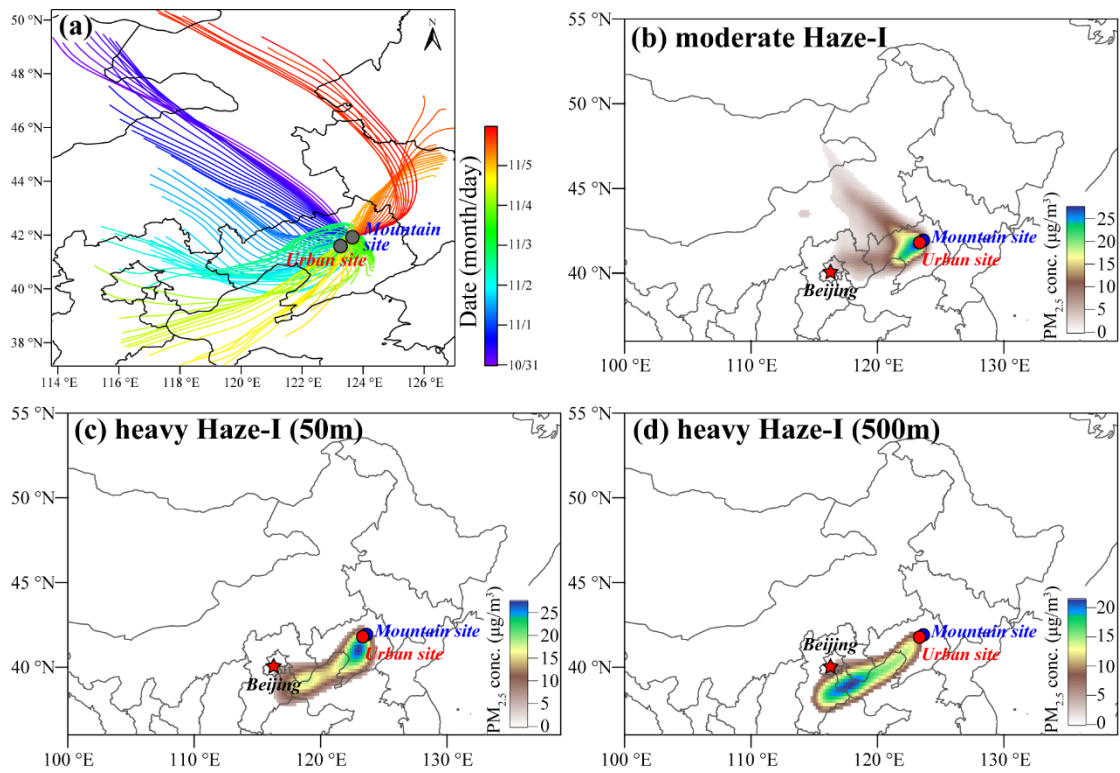

**Figure S5.** (a) 24-h air mass backward trajectories on 500 m height before arriving at Shenyang during 31 October-5 November. Concentration-weighted trajectory (CWT) plots of PM<sub>2.5</sub> at the urban and mountain sites during the Haze-I event: (b) moderate Haze-I on 500 m height; (c-d) heavy Haze-I on 50 m and 500 m heights.

## 6. Concentrations of trace gases

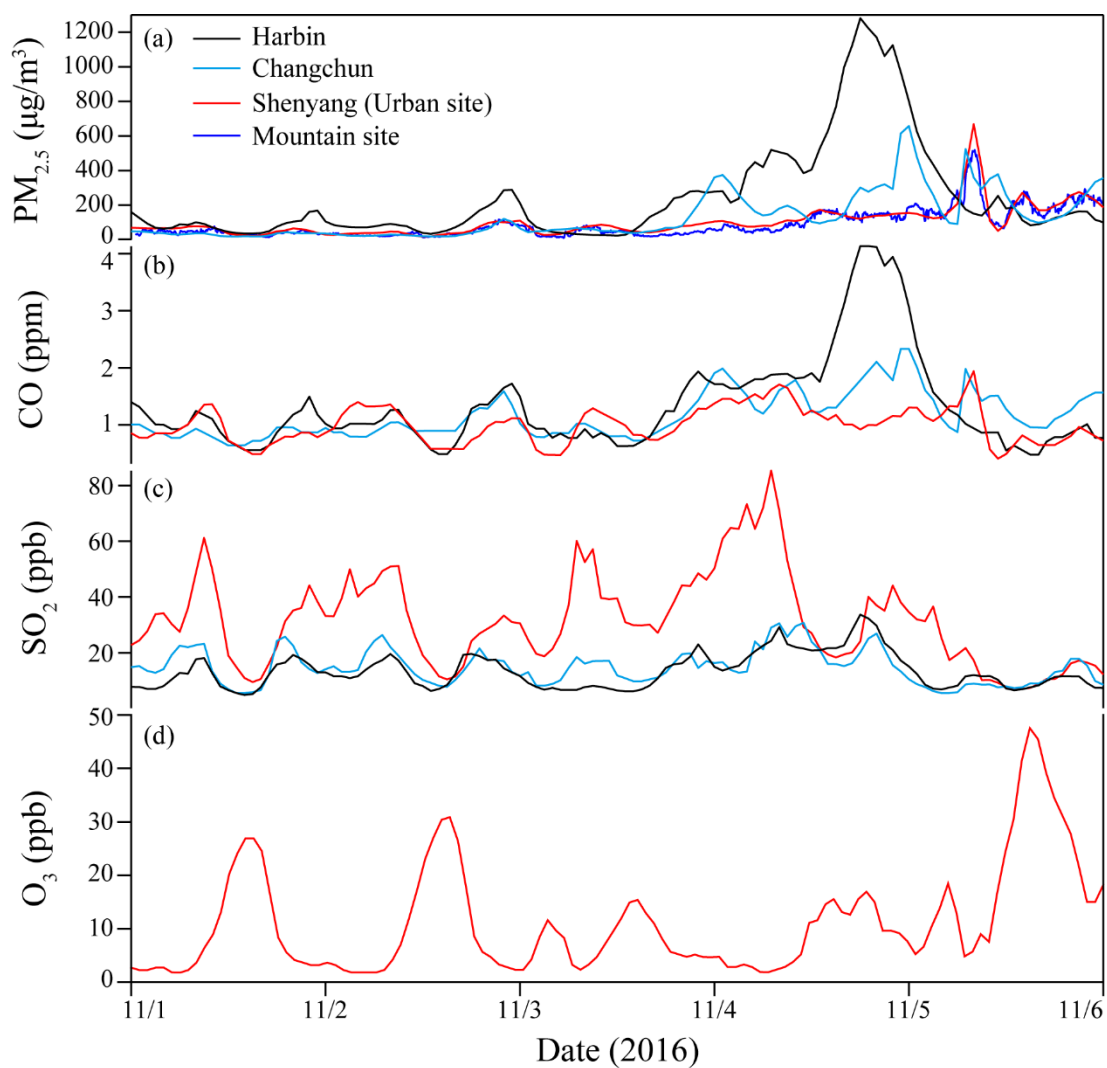

**Figure S6.** Time series of  $PM_{2.5}$  and three trace gases (i.e.,  $CO$ ,  $SO_2$ , and  $O_3$ ) in Harbin city, Changchun city, Shenyang city (the urban site), and the mountain site from 1 to 5 November 2016: **(a)**  $PM_{2.5}$ ; **(b)**  $CO$ ; **(c)**  $SO_2$ ; **(d)**  $O_3$ . These data have been obtained from China's Air Quality Online Monitoring and Analysis Platform, except for the  $PM_{2.5}$  at the mountain site.

## 7. Size distribution of individual particles

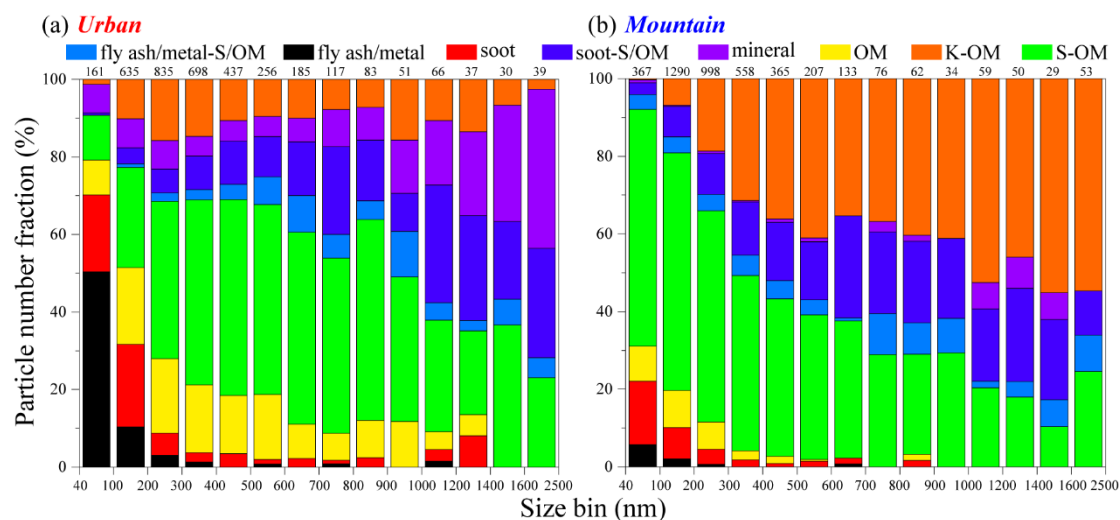

**Figure S7.** Size distribution of individual particles at **(a)** the urban site and **(b)** the mountain site. Analyzed particle numbers are listed on the top of each rectangle.

## 8. Comparison on PM<sub>2.5</sub> data

**Table S1.** Comparison on PM<sub>2.5</sub> mass concentrations from quartz filters and nearby monitoring station.

| Date     | Urban site ( $\mu\text{g}/\text{m}^3$ ) | Nearby monitoring station ( $\mu\text{g}/\text{m}^3$ ) | Deviation |
|----------|-----------------------------------------|--------------------------------------------------------|-----------|
| 10/31 DT | 69                                      | 59                                                     | 14%       |
| 10/31 NT | 115                                     | 104                                                    | 10%       |
| 11/1 DT  | 108                                     | 94                                                     | 13%       |
| 11/1 NT  | 75                                      | 65                                                     | 13%       |
| 11/2 DT  | 100                                     | 91                                                     | 9%        |
| 11/2 NT  | 107                                     | 96                                                     | 10%       |
| 11/3 DT  | 110                                     | 98                                                     | 11%       |
| 11/3 NT  | 144                                     | 132                                                    | 8%        |
| 11/4 DT  | 154                                     | 141                                                    | 8%        |
| 11/4 NT  | 228                                     | 211                                                    | 7%        |
| 11/5 DT  | 253                                     | 232                                                    | 8%        |
| 11/5 NT  | 190                                     | 165                                                    | 13%       |

## 9. OC/EC ratios

**Table S2.** The ratios of OC/EC in Northeast China and North China Plain (NCP) during winter haze days.

| Sampling site | Period                   | OC/EC    | References         |
|---------------|--------------------------|----------|--------------------|
| Urban site    | 31/10-4/11/2016 (Haze-I) | 8.0±1.5  | This study         |
| Urban site    | 4-5/11/2016 (Haze-II)    | 25.4±5.9 | This study         |
| Mountain site | 31/10-4/11/2016 (Haze-I) | 10.6±2.2 | This study         |
| Mountain site | 4-5/11/2016 (Haze-II)    | 27.9±4.7 | This study         |
| Beijing city  | 16-19/1/2010             | 4.5      | Zhao et al. (2013) |
| Jinan city    | 13-23/12/2014            | 5.5      | Chen et al. (2017) |
| Tianjin city  | 10-12/1/2013             | 5.3      | Han et al. (2014)  |



## References

- Chen, S., Xu, L., Zhang, Y., Chen, B., Wang, X., Zhang, X., Zheng, M., Chen, J., Wang, W., Sun, Y., Fu, P., Wang, Z., and Li, W.: Direct observations of organic aerosols in common wintertime hazes in North China: insights into direct emissions from Chinese residential stoves, *Atmos. Chem. Phys.*, 17, 1259-1270, <https://doi.org/10.5194/acp-17-1259-2017>, 2017.
- Han, S., Wu, J., Zhang, Y., Cai, Z., Feng, Y., Yao, Q., Li, X., Liu, Y., and Zhang, M.: Characteristics and formation mechanism of a winter haze–fog episode in Tianjin, China, *Atmos. Environ.*, 98, 323-330, <https://doi.org/10.1016/j.atmosenv.2014.08.078>, 2014.
- Zhao, X. J., Zhao, P. S., Xu, J., Meng, W., Pu, W. W., Dong, F., He, D., and Shi, Q. F.: Analysis of a winter regional haze event and its formation mechanism in the North China Plain, *Atmos. Chem. Phys.*, 13, 5685-5696, <https://doi.org/10.5194/acp-13-5685-2013>, 2013.
